# Supplementary material for: Impaired Mitochondrial Network Morphology and Reactive Oxygen Species Production in Fibroblasts from Parkinson’s Disease Patients
Source: MDPI journal article supplement (doi:10.3390/biomedicines12020282), 2024-01-25
Supplement: s1 [file s1]

## S1. ANCOVA

A two-factor analysis of covariance (ANCOVA) was conducted to evaluate the influence of age and gender on the dependent variables [*Mitochondrial\_footprint*, *Mitochondrial\_branch\_length*, *Individuals/mitonetworks\_ratio*, *Individual mitochondrial\_length*, *Average\_mitochondrial\_junction\_per\_cell*], with baseline scores included as a covariate. Fibroblast's donors were categorized by age (over 60 years and under 60 years) and gender (male and female). Preliminary checks validated no violation of the assumptions of normality, linearity, homogeneity of variance and regression slopes, and reliable measurement of the covariate. The interaction effect between age and sex was not statistically significant.

The tables present statistical data of covariance analysis (ANCOVA). Tables provides the pairwise comparison data using Bonferroni adjustment for multiple tests. The interaction effect between age and gender was not statistically significant.

### *Mitochondrial\_footprint*

| Covariate   | Sum of Squares | Mean Square | F Value | P Value |
|-------------|----------------|-------------|---------|---------|
| sex         | 30004.3        | 30004.3     | 0.16    | 0.68    |
| age         | 30004.3        | 30004.3     | 0.16    | 0.68    |
| Interaction | 30004.3        | 30004.3     | 0.16    | 0.68    |

### *Mitochondrial\_branch\_length*

| Covariate   | Sum of Squares | Mean Square | F Value | P Value |
|-------------|----------------|-------------|---------|---------|
| sex         | 0.097          | 0.09        | 0.37    | 0.53    |
| age         | 0.097          | 0.09        | 0.37    | 0.53    |
| Interaction | 0.097          | 0.09        | 0.37    | 0.53    |

### *Individuals/mitonetworks\_ratio*

| Covariate   | Sum of Squares | Mean Square | F Value | P Value |
|-------------|----------------|-------------|---------|---------|
| sex         | 0.94           | 0.94        | 0.23    | 0.63    |
| age         | 0.94           | 0.94        | 0.23    | 0.63    |
| Interaction | 0.94           | 0.94        | 0.23    | 0.63    |

### *Individual mitochondrial\_length*

| Covariate   | Sum of Squares | Mean Square | F Value | P Value |
|-------------|----------------|-------------|---------|---------|
| sex         | 0.01           | 0.01        | 0.14    | 0.7     |
| age         | 0.01           | 0.01        | 0.14    | 0.7     |
| Interaction | 0.01           | 0.01        | 0.14    | 0.7     |

### *Average\_mitochondrial\_junction\_per\_cell*

| Covariate   | Sum of Squares | Mean Square | F Value | P Value |
|-------------|----------------|-------------|---------|---------|
| sex         | 124.5          | 124.5       | 1.32    | 0.25    |
| age         | 124.5          | 124.5       | 1.32    | 0.25    |
| Interaction | 124.5          | 124.5       | 1.32    | 0.25    |

S2.

**Table S1.** *Summary table.*

| Line and Abbreviation   | Mitochondrial footprint | Median MN branch length   | Individual mitochondria/MN ratio | Median individual mitochondria length | Average MN junctions per cell | Mitochondrial potential   | Cytosolic ROS production rate | Mitochondrial ROS production rate |
|-------------------------|-------------------------|---------------------------|----------------------------------|---------------------------------------|-------------------------------|---------------------------|-------------------------------|-----------------------------------|
| Control1 (C1)           | –                       | –                         | –                                | –                                     | –                             | with C2                   | with C2                       | N/A                               |
| Control1 +H2O2 (C1S)    | –                       | ↓ rel C1                  | –                                | ↓ rel C1                              | ↓ rel C1                      | with C2S                  | N/A                           | with C2S                          |
| Control2 (C2)           | –                       | –                         | –                                | –                                     | –                             | with C1                   | with C1                       | N/A                               |
| Control2 +H2O2 (C2S)    | ↓ rel C1S               | ↓ rel C1S                 | –                                | –                                     | ↓ rel C1S                     | with C1S                  | N/A                           | with C1S                          |
| LRRK (L)                | –                       | –                         | –                                | –                                     | –                             | –                         | –                             | N/A                               |
| LRRK+H2O2 (LS)          | –                       | ↓ rel L                   | –                                | –                                     | ↓ rel L                       | ↓ rel C1S+C2S             | N/A                           | –                                 |
| PINK (P)                | –                       | –                         | ↑ rel C1,C2                      | ↓ rel C1,C2                           | –                             | –                         | ↑ rel C1+C2                   | N/A                               |
| PINK+H2O2 (PS)          | –                       | ↓ rel P                   | ↓ rel P                          | –                                     | ↑ rel C1,C2                   | ↓ rel P                   | N/A                           | ↑ rel C1S+C2S                     |
| PINK/Parkin (PP)        | ↑ rel C1,C2             | ↑ rel C1,C2               | ↑ rel C1,C2                      | –                                     | ↑ rel C1,C2                   | ↑ rel C1+C2               | ↑ rel C1+C2                   | N/A                               |
| PINK/Parkin +H2O2 (PPS) | ↑ rel C1S,C2S           | ↓ rel PP<br>↑ rel C1S,C2S | ↑ rel C1S,C2S                    | ↓ rel PP                              | ↑ rel C1S,C2S                 | ↓ rel PP<br>↓ rel C1S+C2S | N/A                           | –                                 |
| A53T (A)                | –                       | ↑ rel C2                  | –                                | ↑ rel C1                              | –                             | ↑ rel C1+C2               | ↑ rel C1+C2                   | N/A                               |
| A53T+H2O2 (AS)          | ↑ rel C2S               | ↑ rel C1S,C2S             | –                                | ↑ rel C1S                             | –                             | –                         | N/A                           | ↑ rel C1S+C2S                     |

A significant decrease (↓) or increase (↑) in the parameter. Relatively (rel). Parameter was not measured (N/A).

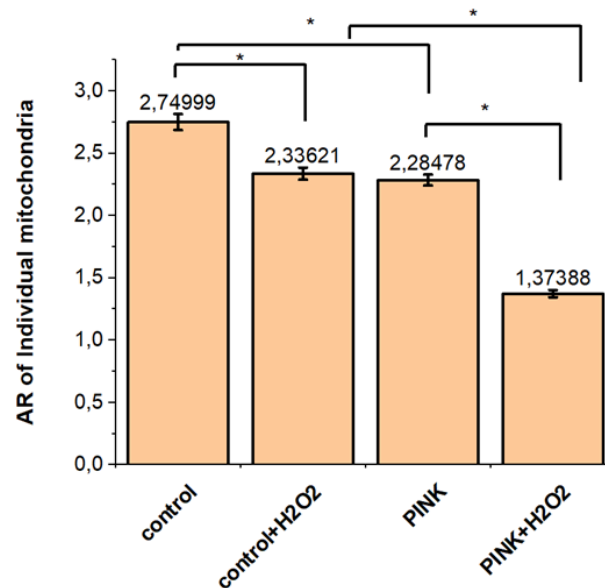

**Figure S1.** *Aspect ratio (AR) of individual mitochondria in Control fibroblasts and fibroblasts with PINK1 mutation measured using “Particle Analyzer” Fiji plugin.*
